# Supplementary material for: Conserved motifs in the hypervariable domain of chikungunya virus nsP3 required for transmission by Aedes aegypti mosquitoes
Source: PubMed Central journal article supplement (PMC6249005; doi:10.1371/journal.pntd.0006958), 2018-11-09
Supplement: pntd.0006958.s001.pdf [file pntd.0006958.s001.pdf]

**S1 Fig**

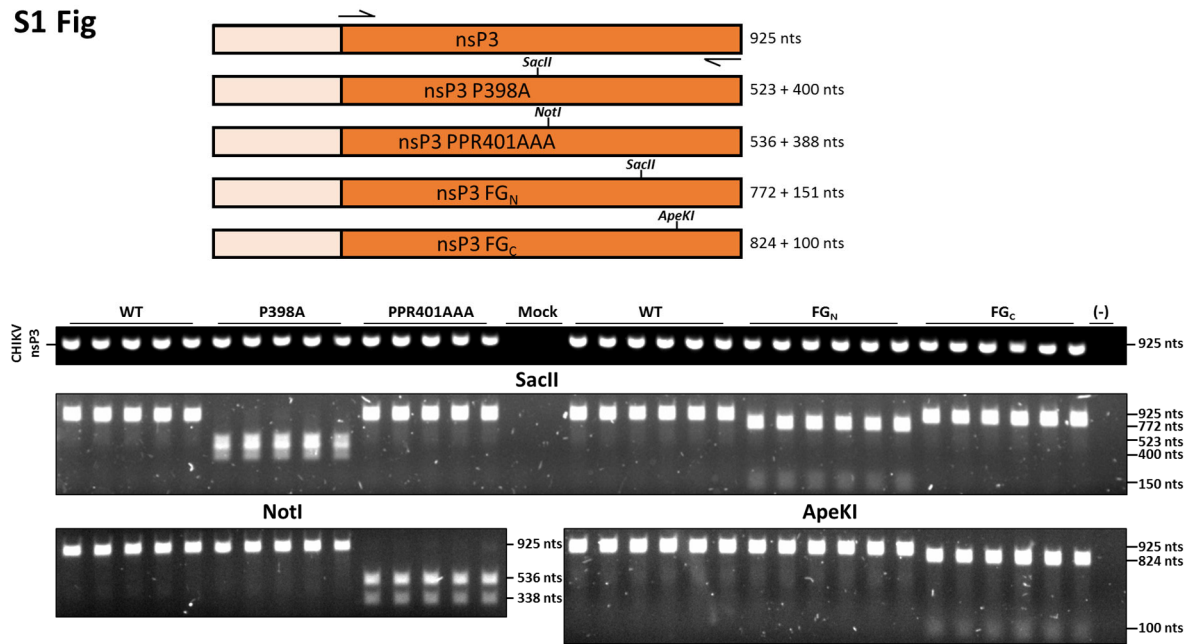

**S1. Fig. Verification of CHIK<sub>IC</sub> nsP3 mutants *in vivo* in *Ae. aegypti* mosquitoes.** RNA was isolated from the bodies of mosquitoes with CHIKV-positive saliva. The nsP3 gene was amplified by RT-PCR and digested with *SacII*, *NotI* or *ApeKI* to screen for preservation of the expected mutations.
